# Supplementary material for: Risk of death following COVID-19 vaccination or positive SARS-CoV-2 test in young people in England
Source: Springer Nature journal article supplement (doi:10.1038/s41467-023-36494-0), 2023-03-27
Supplement: MOESM1 [file 41467_2023_36494_MOESM1_ESM.pdf]

# Risk of death following COVID-19 vaccination or positive SARS-CoV-2 test in young people in England

## Supplementary Information

**Supplementary Fig. 1 | Sample flow for the death registrations and Hospital Episode Statistics datasets. a Deaths since vaccination. b Deaths since positive test for SARS-CoV-2.**

**a**

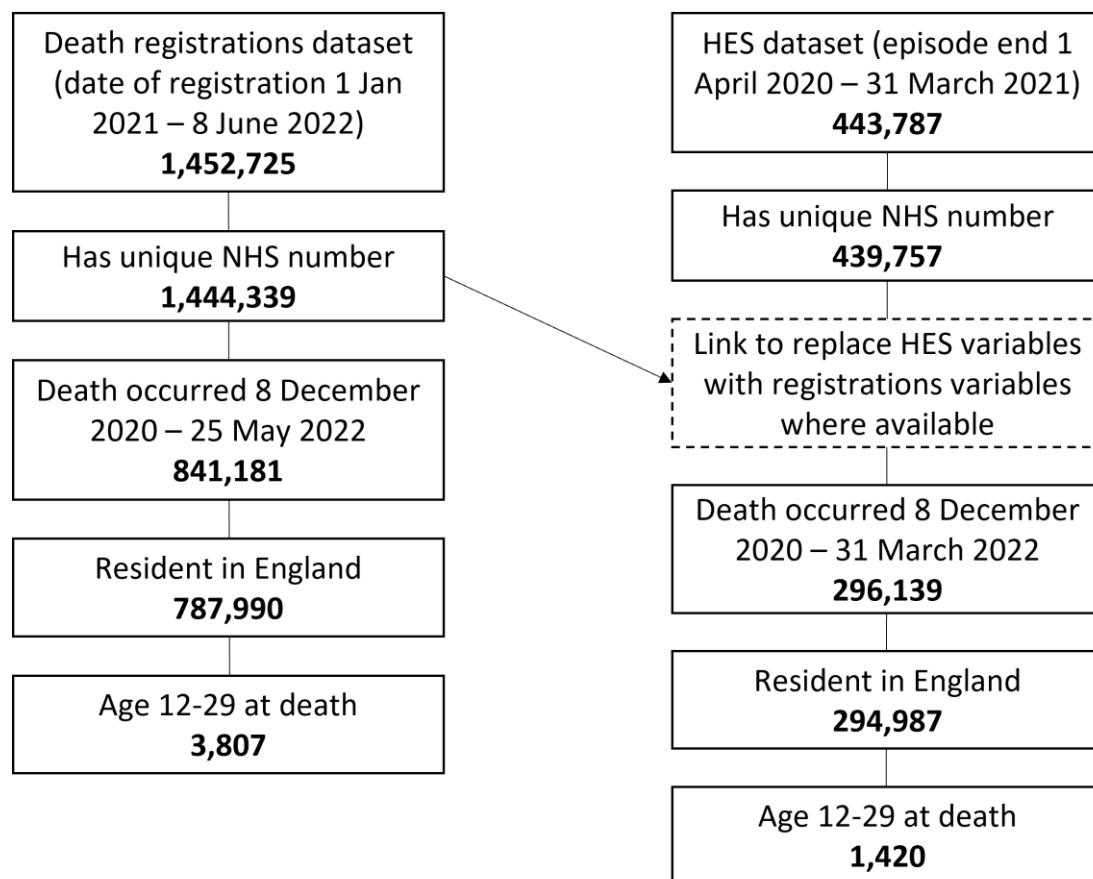

**b**

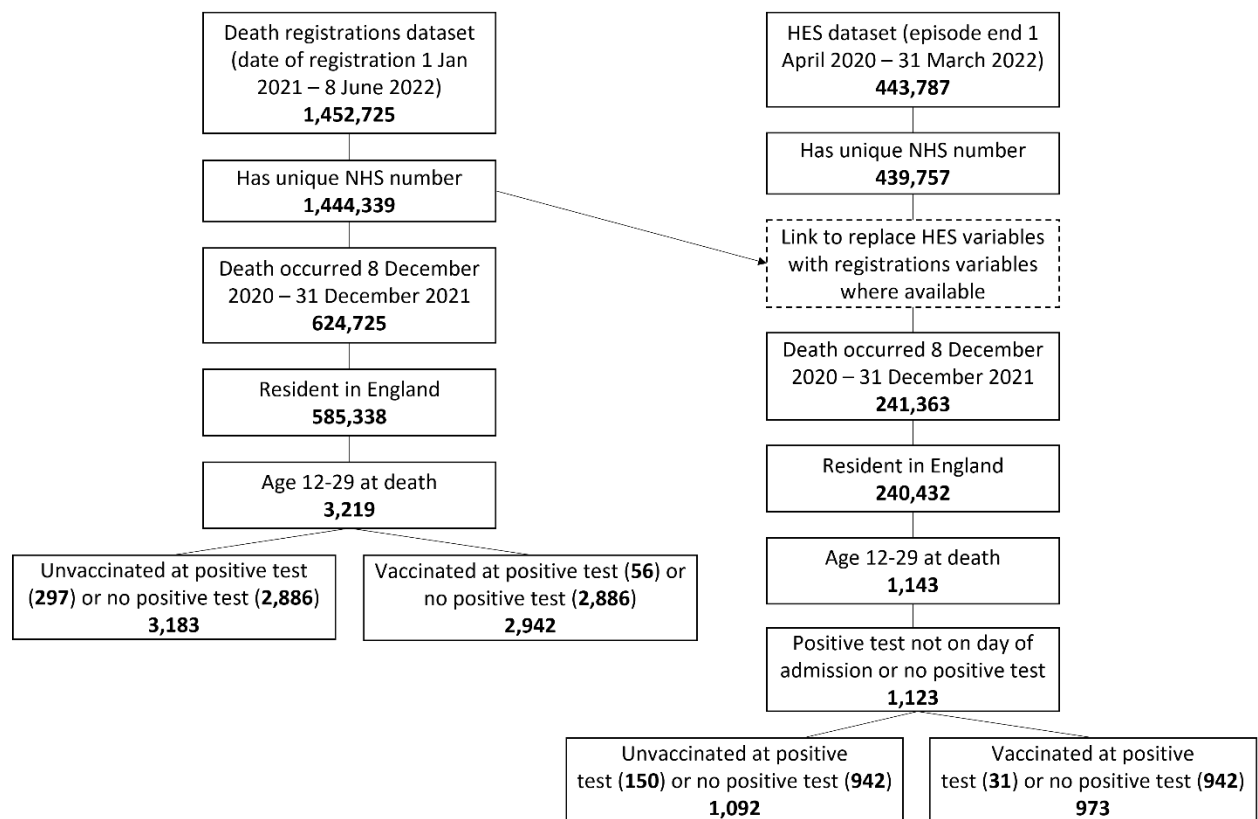

**Supplementary Fig. 2 | Number of deaths that occurred each week for weeks since December 8 2020, young people aged 12-29 on date of death, by last vaccination dose received.** All-cause and cardiac deaths are shown for the ONS death registration data, and all-cause deaths are shown for the HES data. Vaccination status was suppressed when the number of deaths were small and could risk being disclosive.

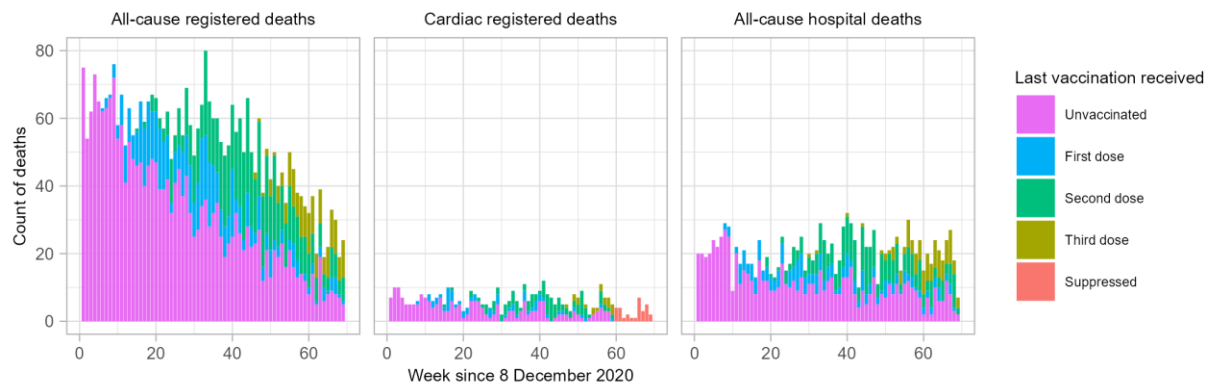

**Supplementary Fig. 3 | Number of deaths that each week for weeks since December 8 2020, for deaths recorded by 31 December, young people aged 12-29 on date of death, by whether they had had a positive test for SARS-CoV-2 at any point.** All-cause and cardiac deaths are shown for the ONS registrations data, and all-cause deaths are shown for the HES data. Positive SARS-CoV-2 status was suppressed when the number of deaths were small and could risk being disclosive.

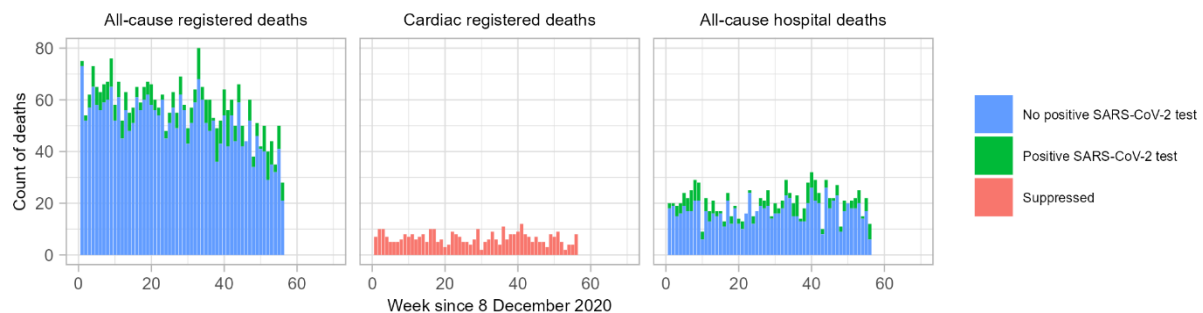

**Supplementary Fig. 4 | Number of deaths each week since vaccination (by dose) and positive test for SARS-CoV-2 for the registrations (all-cause and cardiac deaths) and HES (all-cause deaths) data.**  
**a** Deaths since vaccination. **b** Deaths since positive test for SARS-CoV-2.

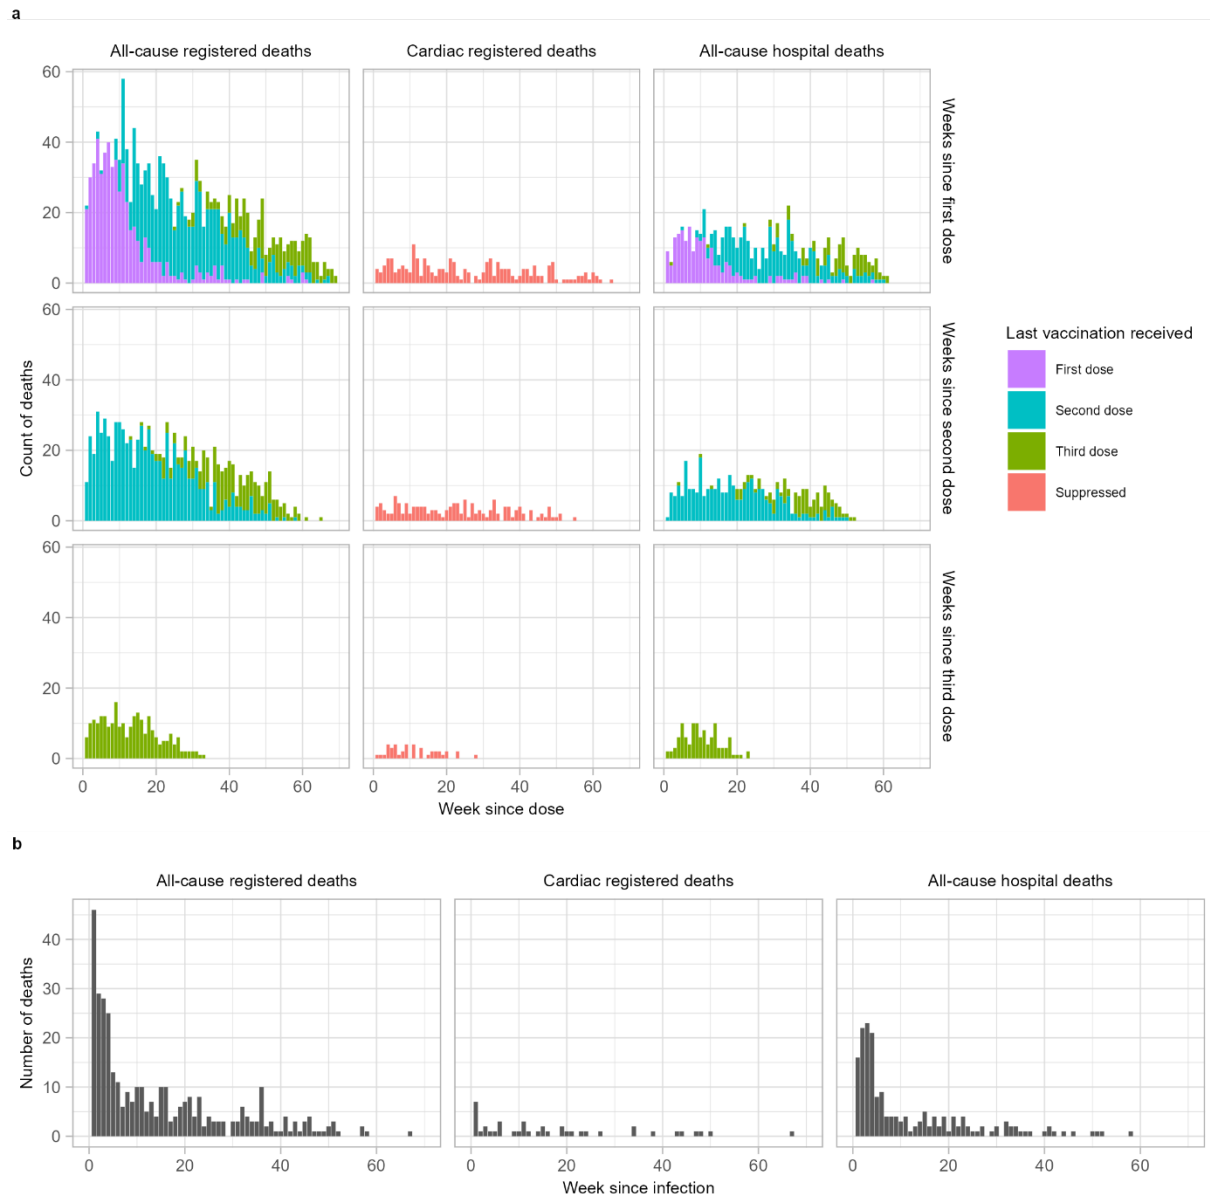

**Supplementary Fig. 5 | Relative incidence of cardiac death and all-cause death in the risk period after vaccination compared to the baseline period, broken down by sex and vaccine vector. Data are presented as incidence rate ratio with 95% confidence intervals. n=3,807 all-cause registered deaths, 444 cardiac registered deaths and 1,420 all-cause hospital deaths. a Results for males b Results for females.**

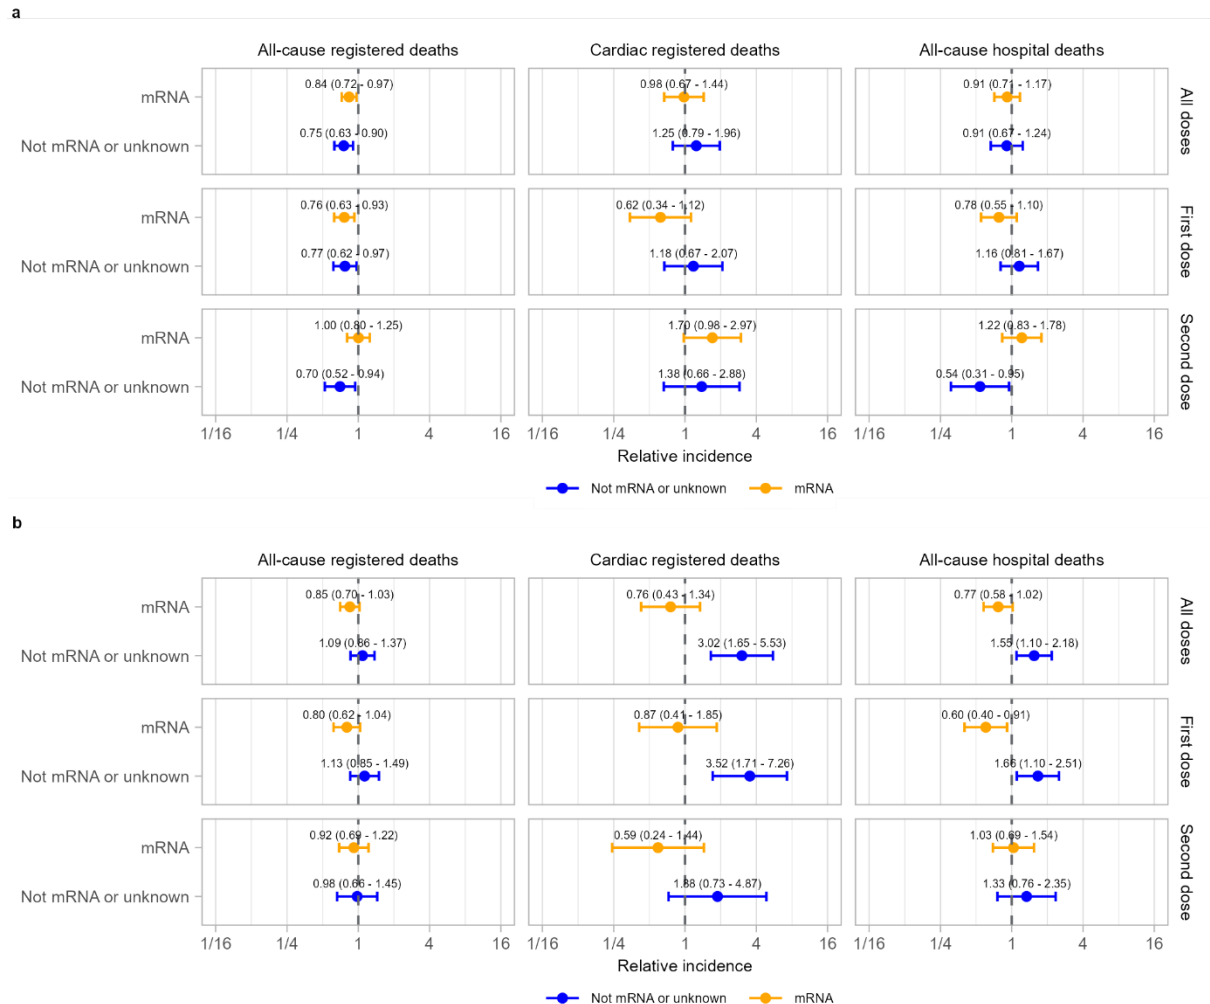

**Supplementary Fig. 6 | Relative incidence of cardiac deaths after a second dose of an mRNA vaccination for males for different lengths of risk period.** Data are presented as incidence rate ratio with 95% confidence intervals. n=444 cardiac registered deaths. Week 12 is indicated in orange.

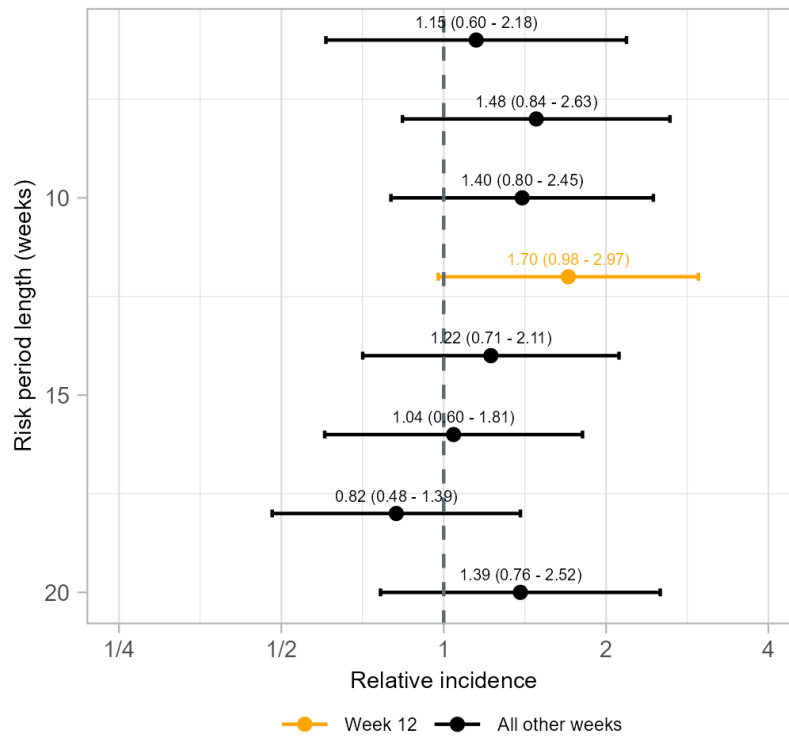

**Supplementary Fig. 7 | Relative incidence of cardiac and all-cause deaths after vaccination for different lengths of risk period.** Week 12 is indicated in orange. Risk periods exceeding the interval between doses are subject to negative bias (the median interval was 10 weeks between dose 1 and 2 and 27.5 weeks between dose 2 and 3). Models are adjusted for calendar time. Data are presented as incidence rate ratio with 95% confidence intervals. n=3,807 all-cause registered deaths, 444 cardiac registered deaths and 1,420 all-cause hospital deaths. **a** All doses combined. **b** Separate doses.

**a**

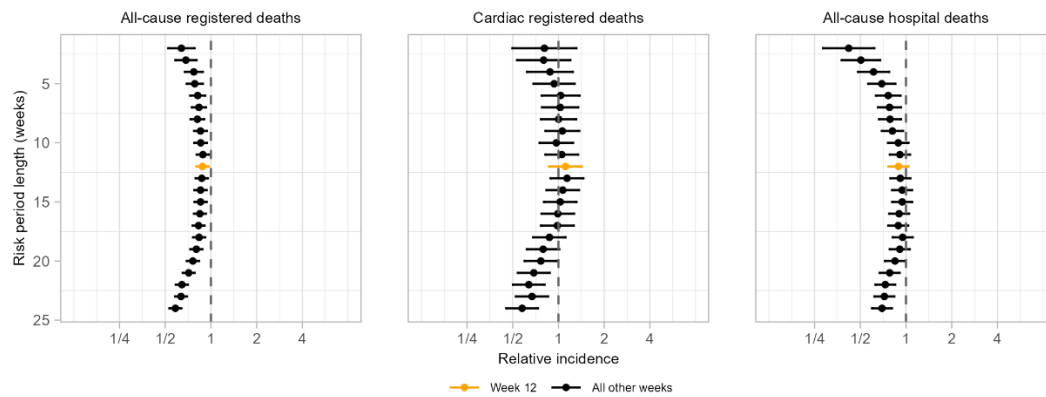

**b**

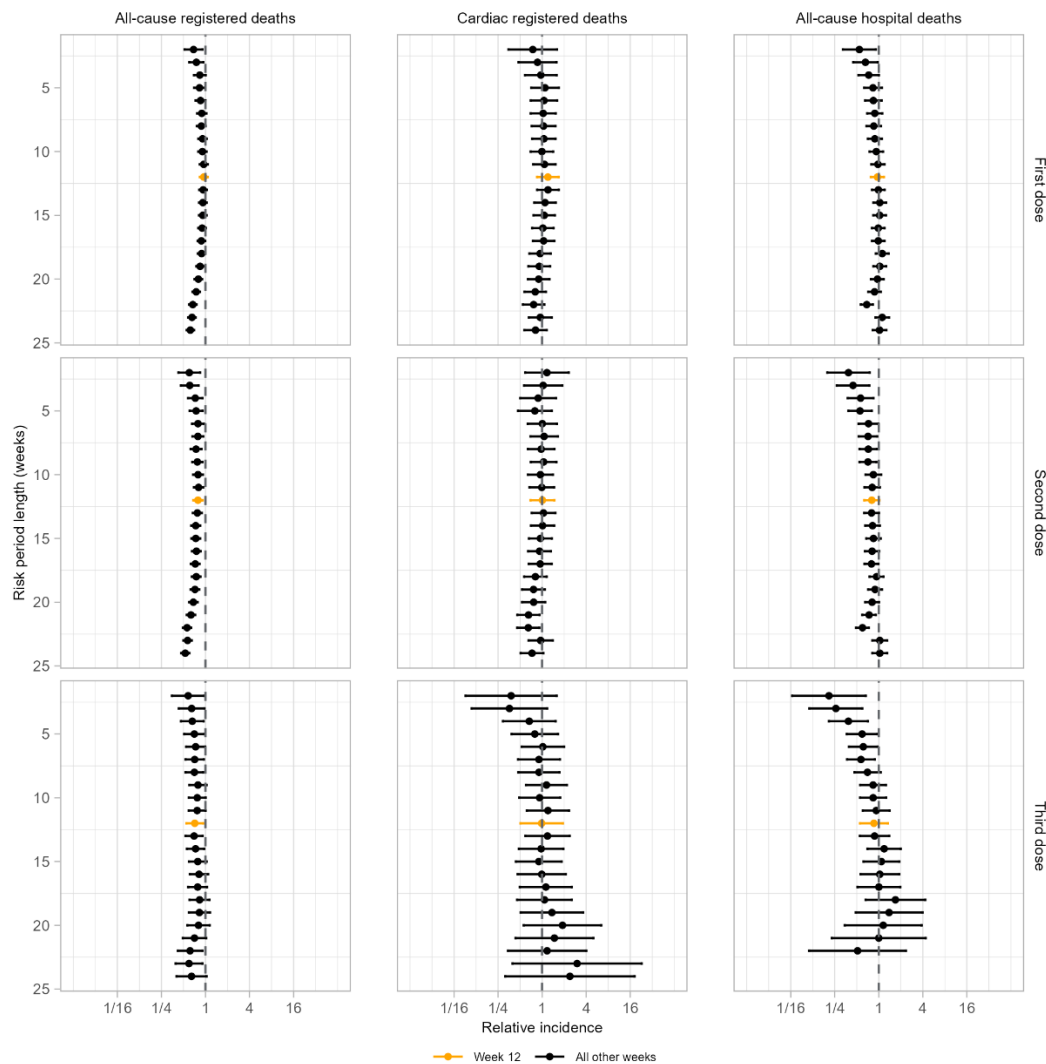

**Supplementary Fig. 8 | Relative incidence of cardiac and all-cause deaths after positive SARS-CoV-2 test, for different lengths of risk period.** Data are presented as incidence rate ratio with 95% confidence intervals. n=3,219 all-cause registered deaths, 369 cardiac registered deaths and 1,123 all-cause hospital deaths. **a** Unvaccinated at positive test for SARS-CoV-2. **b** Vaccinated at positive test for SARS-CoV-2. Cardiac registered deaths not shown due to small numbers.

**a**

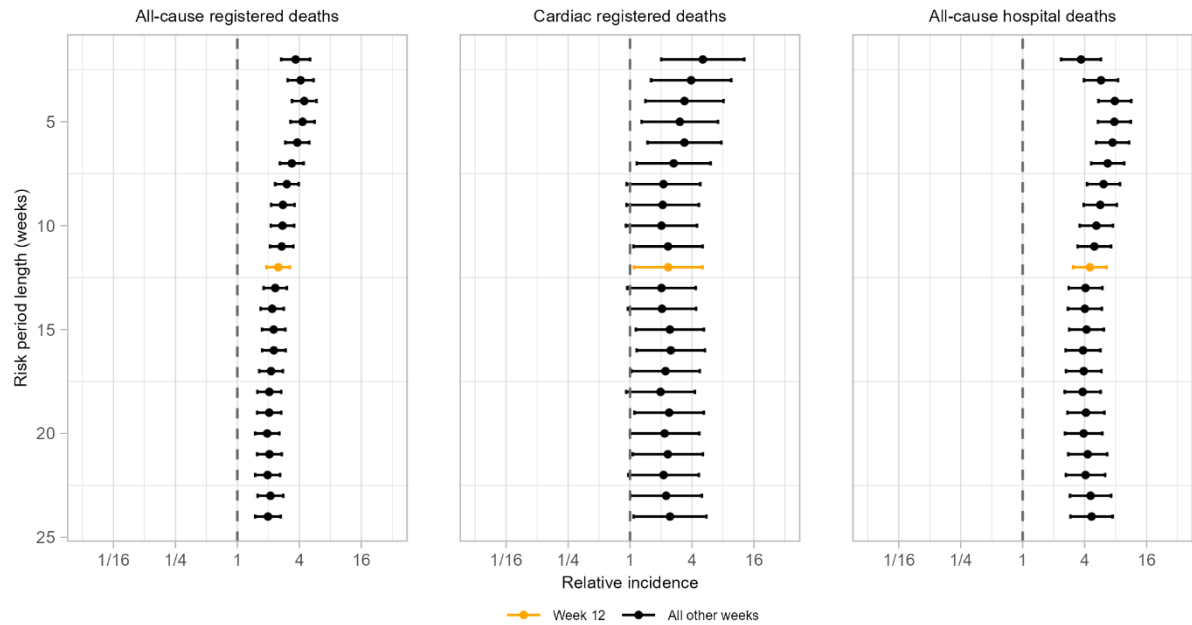

**b**

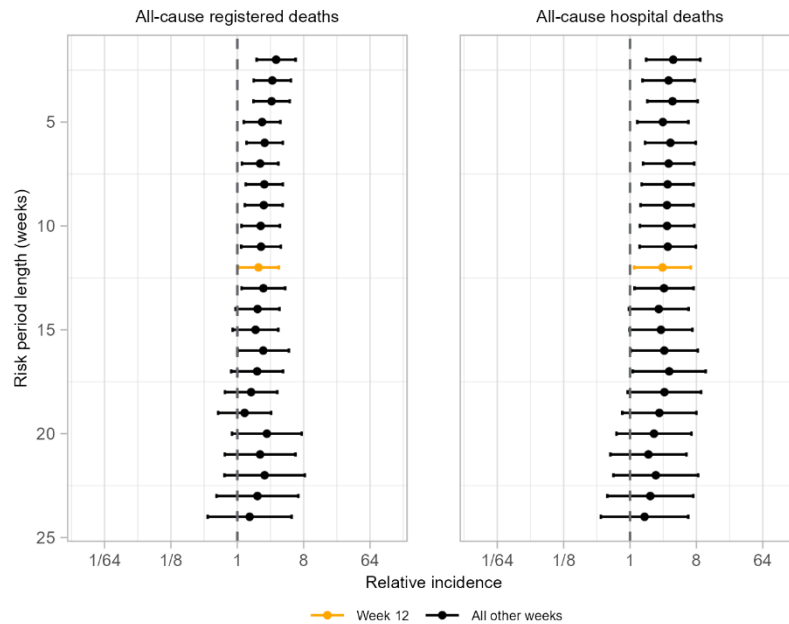



**Supplementary Fig. 9 | Relative incidence of cardiac death and all-cause death in each of the 12 weeks in the risk period after vaccination and in the risk period as a whole (1-12 weeks), compared to the baseline period.** Calendar time is adjusted fortnightly intervals. Data are presented as incidence rate ratio with 95% confidence intervals. n=3,807 all-cause registered deaths, 444 cardiac registered deaths and 1,420 all-cause hospital deaths. **a** Results for all doses combined. **b** Results by dose.

**a**

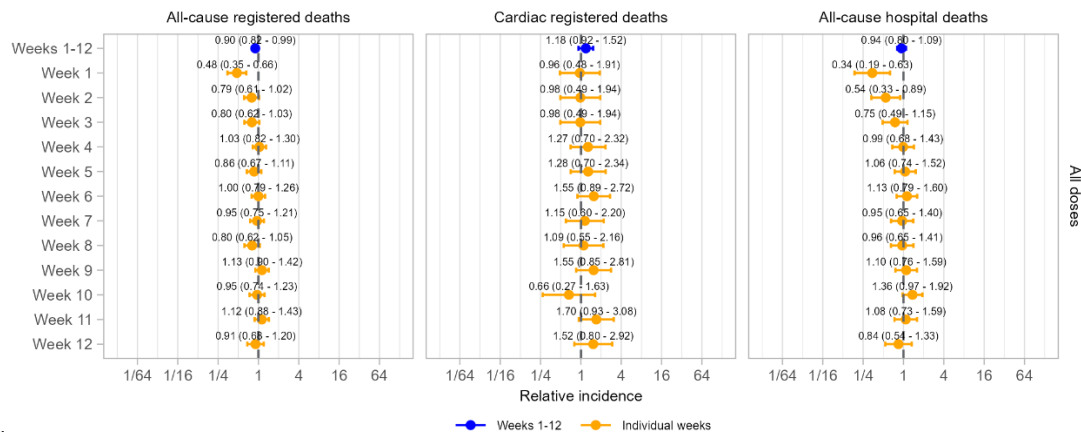

**b**

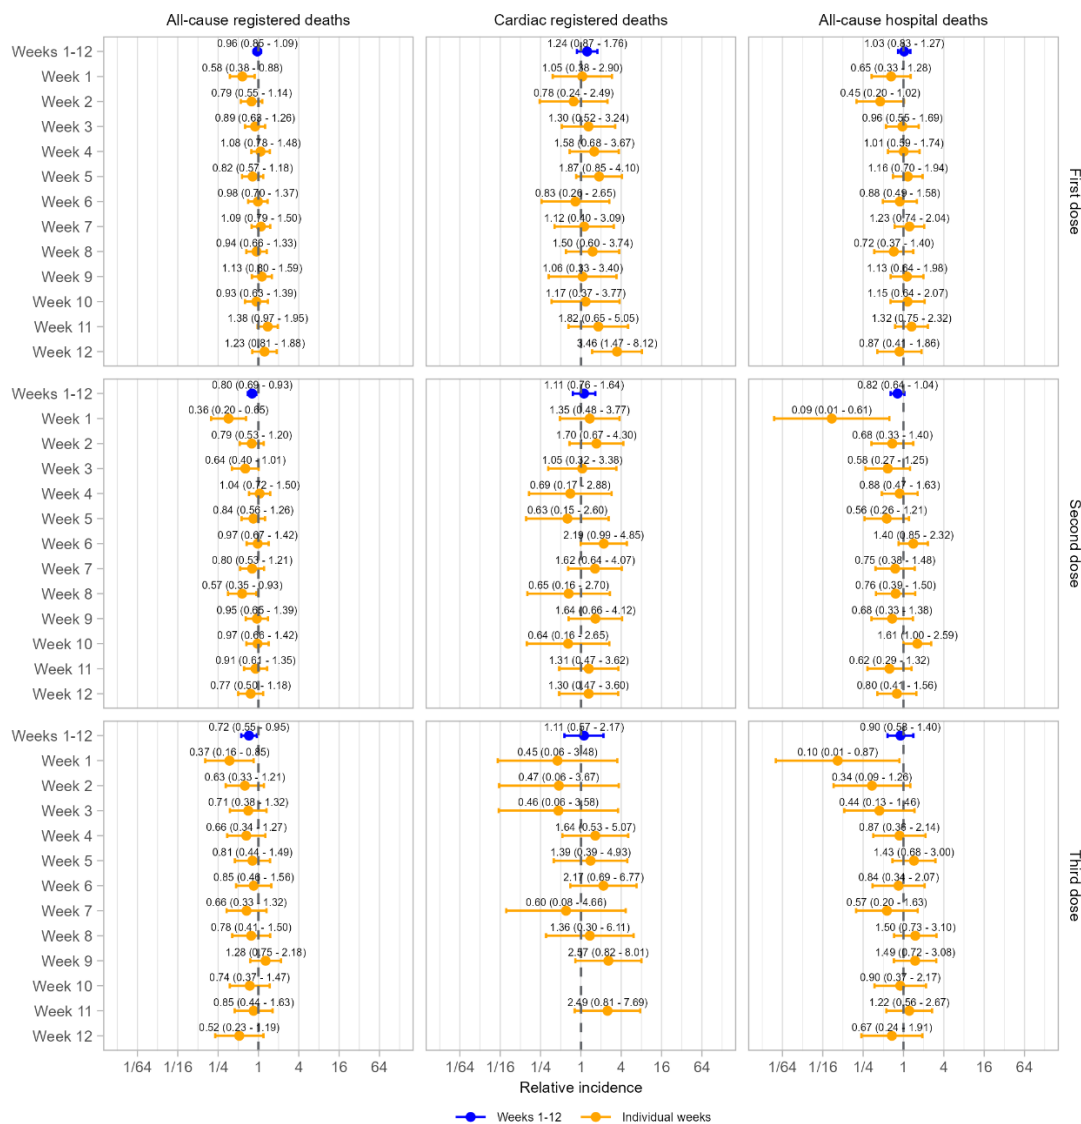

**Supplementary Fig. 10 | Relative incidence of cardiac death and all-cause death in each of the 12 weeks in the risk period after positive test for SARS-CoV-2 and in the risk period as a whole, compared to the baseline period.** Calendar time is adjusted fortnightly intervals. Data are presented as incidence rate ratio with 95% confidence intervals. n=3,219 all-cause registered deaths, 369 cardiac registered deaths and 1,123 all-cause hospital deaths. **a** Results for individuals unvaccinated at time of positive test. **b** Results for individuals vaccinated at time of positive test. Cardiac registered deaths not shown due to small numbers.

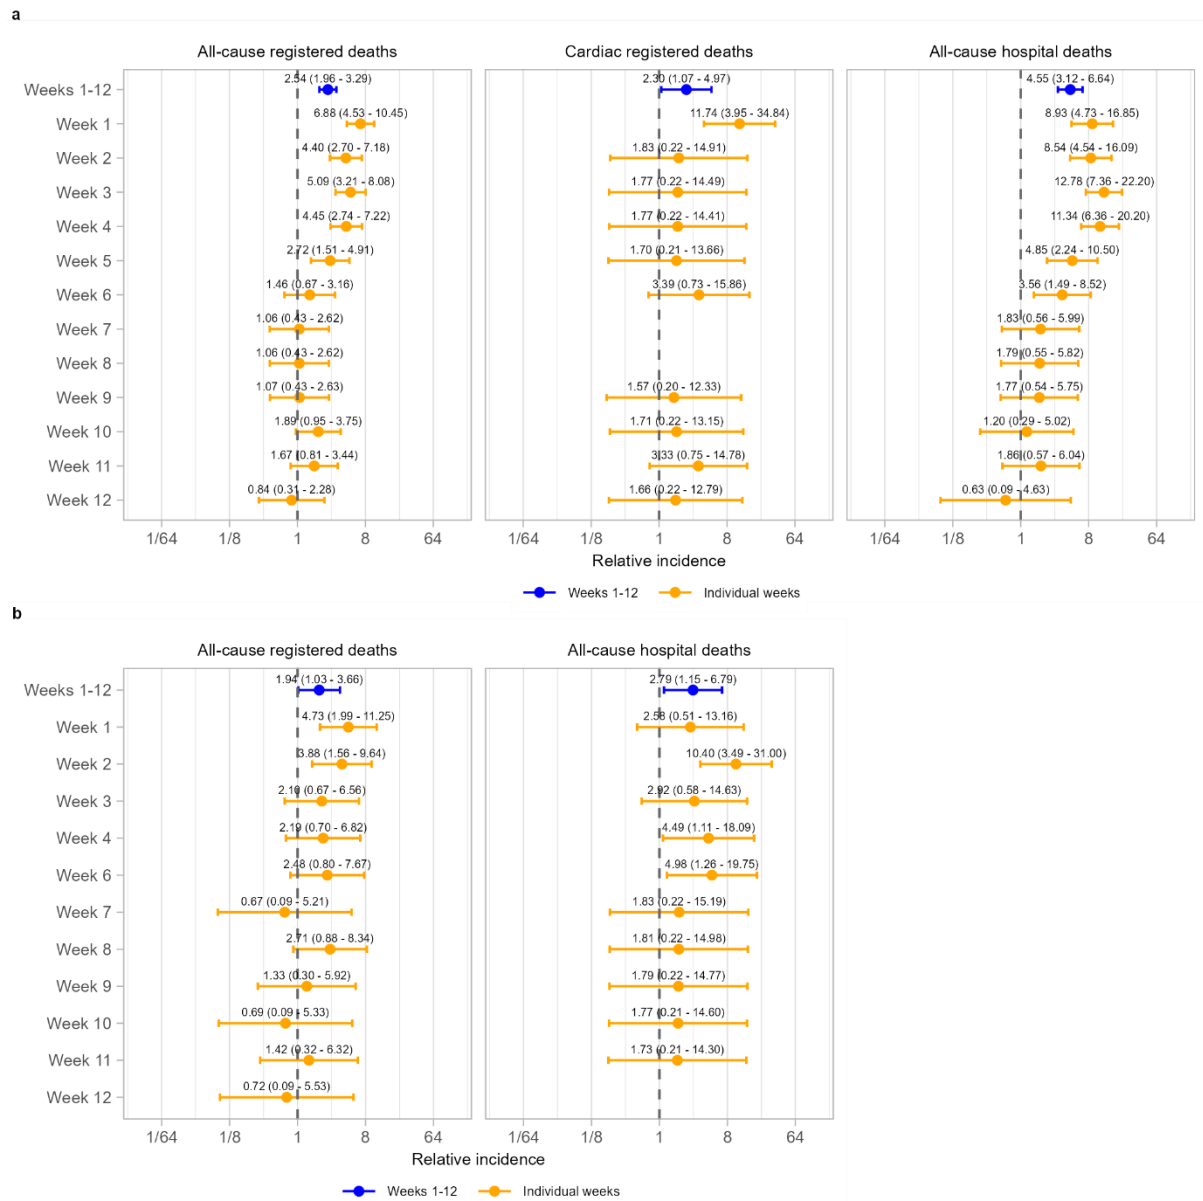

**Supplementary Fig. 11 | Relative incidence of all-cause hospital death in each of the 12 weeks in the risk period after vaccination and in the risk period as a whole (1-12 weeks), compared to the baseline period.** Individuals with a SARS-CoV-2 positive result on the day of hospital admission are excluded. Data are presented as incidence rate ratio with 95% confidence intervals. n=1,420 all-cause hospital deaths.

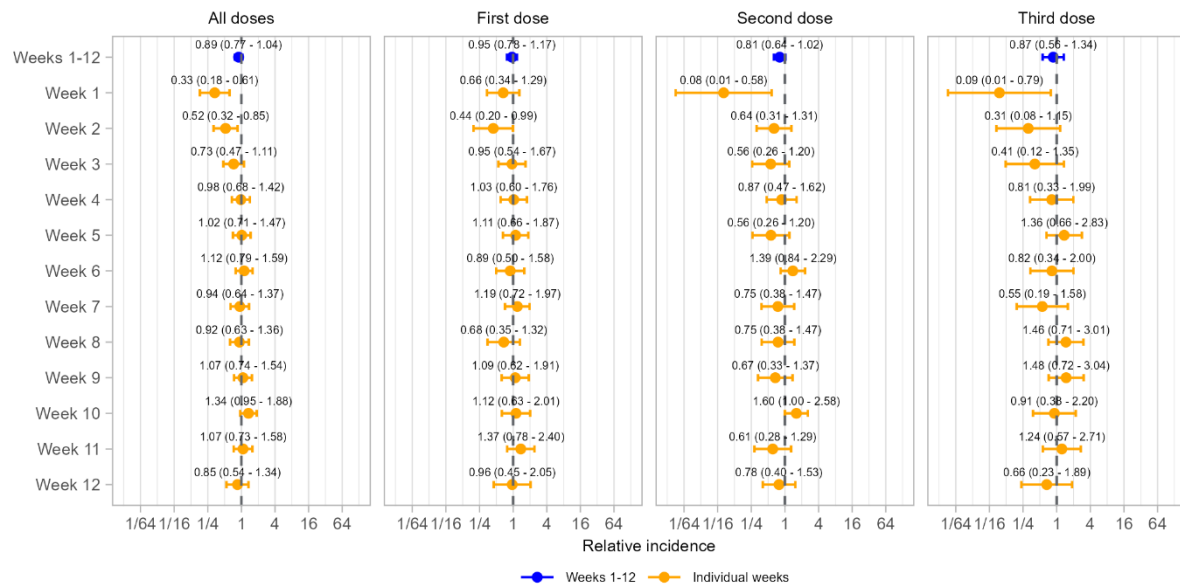

**Supplementary Fig. 12 | Relative incidence of all-cause hospital death in each of the 12 weeks in the risk period after positive test for SARS-CoV-2 and in the risk period as a whole (1-12 weeks), compared to the baseline period.** Individuals with a SARS-CoV-2 positive result on the day of hospital admission are included. Data are presented as incidence rate ratio with 95% confidence intervals. n=1,123 all-cause hospital deaths. **a** Results for individuals unvaccinated at time of positive test. **b** Results for individuals vaccinated at time of positive test.

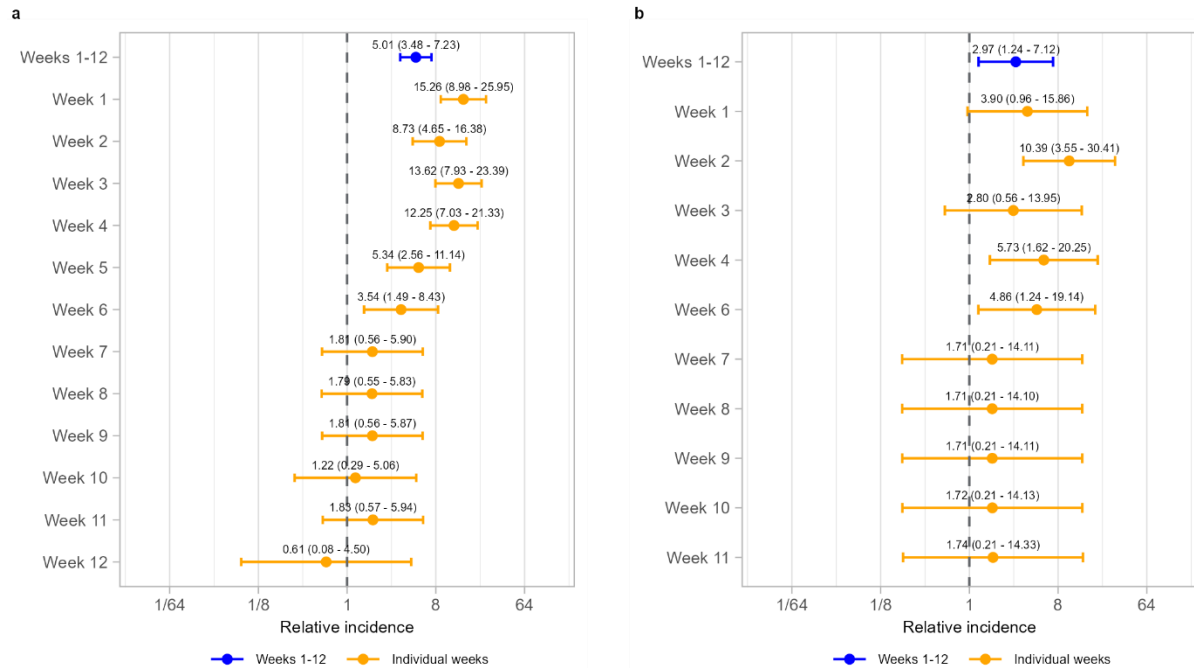

**Supplementary Table 1 | Vaccine vectors by dose for the death registrations dataset for the first and second doses. ‘mRNA’ includes the Pfizer BNT162b2 Pfizer-BioNTech and mRNA-1273 Moderna vaccines. ‘Not mRNA or unknown’ includes the ChAdOx1 Oxford-AstraZeneca vaccine, all other recorded vaccine manufacturers and non-recorded vaccination manufacturers. 239 out of 242 third doses in the registrations dataset, and 108 out of 110 third doses in the hospital dataset were mRNA based.**

| First dose          | Second dose         | Number of individuals in registrations dataset | Number of individuals in hospital dataset |
|---------------------|---------------------|------------------------------------------------|-------------------------------------------|
| mRNA                | mRNA                | 505                                            | 228                                       |
| mRNA                | Not received        | 334                                            | 120                                       |
| mRNA                | Not mRNA or unknown | 111                                            | 51                                        |
| Not received        | Not received        | 2,295                                          | 790                                       |
| Not mRNA or unknown | Not received        | 199                                            | 84                                        |
| Not mRNA or unknown | Not mRNA or unknown | 363                                            | 147                                       |

**Supplementary Table 2 | Number of individuals vaccinated who received at least one of each vaccine vector type, by sex.**

|                                                          | Male                        |                           |                            | Female                      |                           |                            |
|----------------------------------------------------------|-----------------------------|---------------------------|----------------------------|-----------------------------|---------------------------|----------------------------|
|                                                          | All-cause registered deaths | Cardiac registered deaths | Hospital registered deaths | All-cause registered deaths | Cardiac registered deaths | Hospital registered deaths |
| Vaccinated with at least one dose of mRNA                | 589                         | 82                        | 222                        | 361                         | 44                        | 177                        |
| Vaccinated with at least one dose of non mRNA or unknown | 416                         | 66                        | 157                        | 257                         | 41                        | 126                        |

**Supplementary Table 3 | Number of individuals vaccinated with each vaccine vector type, by time period vaccinated for the first and second doses for the registrations dataset.**

|                                    | Until 7 April 2021 | After 7 April 2021 |
|------------------------------------|--------------------|--------------------|
| First dose of non-mRNA or unknown  | 541                | 20                 |
| Second dose of non-mRNA or unknown | 28                 | 446                |
| First dose of mRNA                 | 424                | 522                |
| Second dose of mRNA                | 54                 | 451                |

## **Supplementary Methods 1 | Calculations of absolute effects**

We derived estimates of absolute effects using an established method for the self-controlled case series design [40].

Between 9 September 2021 and 31 December 2021, there were 1,131,503 unvaccinated people who tested positive for SARS-CoV-2, and 1,105,761 vaccinated individuals. There were 158 deaths within 12 weeks of a positive SARS-CoV-2 test in unvaccinated individuals, 41 in those who were vaccinated.

Between 8 December 2020 and 25 May 2022, there were 4,012,520 females aged 12 to 29 who received at least one dose of a COVID-19 vaccine between these dates, of which 177,042 received a first dose of a non mRNA or unknown vaccine vector. There were 25 cardiac registered deaths of females within 12 weeks of receiving the first dose of a COVID-19 vaccination, of which 15 had received a first dose of a non mRNA or unknown vaccine vector.

Between 8 December 2020 and 25 May 2022, there were 2,958,893 men aged 12 to 29 who received a second dose of an mRNA based COVID-19 vaccine between these dates. There were 20 cardiac registered deaths of men within 12 weeks of receiving the second dose of an mRNA COVID-19 vaccination.
